# Supplementary material
Source: PubMed Central journal article supplement (PMC3466086)
Supplement: NIHMS300356-supplement-01.pdf [file NIHMS300356-supplement-01.pdf]

**Online data Supplement for “Nitric Oxide Regulates Pulmonary Vascular Smooth Muscle Cell Expression of the Inducible cAMP Early Repressor Gene”**

Andrea U. Steinbicker<sup>a, d</sup>; Heling Liu<sup>b</sup>; Kim Jiramongkolchai<sup>a, e</sup>; Rajeev Malhotra<sup>b</sup>; Elizabeth Y Choe<sup>b, f</sup>; Cornelius J Busch<sup>b, g</sup>; Amanda R. Graveline<sup>a</sup>; Sonya M. Kao<sup>b</sup>; Yasuko Nagasaka<sup>a</sup>; Fumito Ichinose<sup>a</sup>; Emmanuel S. Buys<sup>a</sup>; Peter Brouckaert<sup>c</sup>; Warren M. Zapol<sup>a</sup>; and Kenneth D. Bloch<sup>a, b</sup>

<sup>a</sup>Anesthesia Center for Critical Care Research of the Department of Anesthesia, Critical Care, and Pain Medicine and <sup>b</sup>Cardiovascular Research Center of the Department of Medicine at Massachusetts General Hospital and Harvard Medical School, 55 Fruit Street, Boston, MA, 02114, USA

<sup>c</sup>VIB Department for Molecular Biomedical Research, Ghent University, Ghent, Belgium

Current affiliations: <sup>d</sup>Department of Anesthesiology and Intensive Care Medicine, University of Muenster, 48149 Muenster, Germany; <sup>e</sup>Department of Internal Medicine, Lahey Clinic, Burlington, MA, USA; <sup>f</sup>Department of Cardiovascular Medicine, Stanford, CA, USA; <sup>g</sup>Department of Anesthesiology and Intensive Care, Heidelberg University Hospital, Heidelberg, Germany

Correspondence should be addressed to

Dr. Andrea U. Steinbicker, Department of Anesthesiology and Intensive Care Medicine, University of Muenster, 48149 Muenster, Germany Fax: 0049-251-83-48667; Phone: 0049-251-3824751; E-Mail: [andrea.steinbicker@ukmuenster.de](mailto:andrea.steinbicker@ukmuenster.de), [andrea.steinbicker@gmail.com](mailto:andrea.steinbicker@gmail.com)

## Expanded Materials and Methods

### Materials

S-nitroso glutathione (GSNO) was obtained from Alexis Corp. (San Diego, CA). Forskolin and 8-bromo-cAMP were purchased from Sigma-Aldrich, Inc. (St. Louis, Missouri). L-N<sup>6</sup>-(1-iminoethyl) lysine (L-NIL), ODQ, H89, KT5823, BAPTA-AM, 2-ABP and SKF-96365 were obtained from Calbiochem, Novabiochem, and Novagen Inc. (brands of EMD chemicals, Darmstadt, Germany). Sp-8-pCPT-cGMPS, Sp-8-Br-cGMPS, Rp-8-pCPT-cGMPS, and Rp-8-Br-PET-cGMPS were purchased from Biomol Research Laboratories Inc. (Plymouth Meeting, PA). IL-1 $\beta$  and TNF $\alpha$  were obtained from R&D Systems Inc. (Minneapolis, MN). Anti-CREM/ICER antibody (X-12: sc-440) was obtained from Santa Cruz Biotechnology Inc. (Santa Cruz, CA). Antibodies directed against CREB and phosphorylated CREB (Ser<sup>133</sup>) were obtained from Cell Signaling Technology, Inc. (Beverly, MA).

### Transcription profiling

RNA was extracted from either untreated RPaSMC or RPaSMC exposed to GSNO (100  $\mu$ mol/L) for 1, 2, and 4 hours using the Trizol reagent (Invitrogen Life Technologies Inc., Carlsbad, CA). RNA was purified using the Qiagen RNeasy total RNA isolation method (Quiagen Inc. Valencia, CA). Purified RNA (10 $\mu$ g) was used to generate first strand cDNA by reverse transcription in the presence of dT<sub>24</sub> primer followed by incubation with DNA polymerase to synthesize double-stranded cDNA using Superscript Choice system (Invitrogen). Biotin-labeled cRNA was generated from the double-stranded cDNA by *in vitro* transcription using the ENZO Bioarray High Yield transcript labeling method (Affymetrix Inc., Santa Clara, CA). Labeled cRNA (40  $\mu$ g)

was fragmented in fragmentation buffer (40 mmol/L Tris, pH 8.1, 100 mmol/L potassium acetate, 30 mmol/L magnesium acetate) for 35 min at 94°C. Following confirmation of cRNA quality by hybridization to a test chip (Affymetrix), fragmented cRNA was hybridized to Affymetrix rat U-34A GeneChips containing 8798 gene elements in the GeneChip Fluidics Station 450 and was washed and scanned with the GeneChip® Scanner 3000. Affymetrix GeneChip 5.0 software was used for scanning and data analysis according to Affymetrix protocols. Transcription profiling was performed using two independent preparations of RPaSMCs. The results were confirmed for the genes named in Supplemental Figure 1 by RNA blot analysis and quantitative RT-PCR.

### **Evaluating gene expression data**

For each transcription profiling experiment, gene expression data from untreated RPaSMC were compared to that from cells exposed to GSNO for 1, 2, and 4 hours. GSNO was identified as altering gene expression if, in both transcription profiling experiments, there was a  $\geq 2$ -fold change in gene expression and if the gene was described as present (P) by Affymetrix detection call after GSNO stimulation for genes whose expression was increased or before GSNO stimulation for genes whose expression was decreased. The differentially expressed genes were extracted to generate two groups: Up-regulated and Down-regulated (Supplemental Table 1 and Supplemental Table 2).

Biological pathways of interest, such as oxidative stress responses, apoptosis, cell cycle regulation, and cellular metabolism, were evaluated for up-regulation or down-regulation by GSNO in RPaSMCs using the Gene Microarray Pathway Profiler (<http://www.GenMAPP.org>).[1, 2]

For pathway analysis, criteria for differential gene regulation included a  $\geq 1.5$ -fold change in gene expression after 4h of GSNO exposure in both RPASMC preparations with an Affymetrix call of present at 4h for those genes whose expression was increased or at baseline for genes whose expression was decreased.

### **RNA blot hybridization**

Total RNA from RPaSMC was extracted using Trizol® reagent (Invitrogen) according to the manufacturer's protocol. RNA (15 µg) was fractionated in 1.5 % agarose-formaldehyde gels, transferred to MAGNA CHARGE membranes (Micron Separation, Inc., Westborough, MA), and cross-linked by exposure to UV light. Membranes were hybridized overnight at 42 °C with <sup>32</sup>P-labeled DNA restriction fragments. Membranes were washed at high stringency in a solution containing 3 mmol/L sodium citrate, 30 mmol/L sodium chloride, and 0.1 % SDS at 65°C and were exposed to X-ray film. Equal loading of RNA on gels was confirmed by staining 28S and 18S ribosomal RNA with ethidium bromide. RNA blots shown are representative of at least three experiments. Membranes were hybridized with DNA fragments specifying rat ICER, mouse heme oxygenase 1 (HO1), rat sGC  $\alpha$ 1 (sGC $\alpha$ 1) and  $\beta$ 1 (sGC $\beta$ 1), human tissue plasminogen activator (tPA), rat hexokinase 2 (HK2), metallothionein 1 (MT1),  $\gamma$ -glutamylcysteine synthetase heavy chain (GCS:hc),  $\gamma$ -glutamylcysteine synthetase light chain (GCS:lc), p21<sup>(Waf1/Cip1)</sup>, endothelin 1 (ET1), angiotensin II receptor (AT2R), and transforming growth factor- $\beta$ 3 (TGF $\beta$ 3).

### **Measurement of gene expression using quantitative RT-PCR**

RNA was extracted from cells using Trizol (Invitrogen, Carlsbad, CA), and cDNA was synthesized using MMLV-RT (Invitrogen). Real-time amplification of transcripts was detected using a Mastercycler ep

Realplex (Eppendorf, Hamburg, Germany). The relative expression of target transcripts was normalized to levels of *18S* rRNA. Changes in the relative gene expression normalized to levels of *18S* rRNA were determined using the relative CT method.

### **Immunoblot**

RPaSMC in 12-well plates were washed with ice-cold PBS and harvested in 100  $\mu$ l RIPA buffer/well with EDTA containing 1  $\mu$ l/100  $\mu$ l buffer each of phosphatase inhibitor cocktail 1 and protease inhibitor and phosphatase inhibitor cocktail 2. Fifty  $\mu$ l of the cell extracts were added to 10  $\mu$ l Laemmli's SDS 6x buffer, boiled 5 min at 100°C, and kept on ice before being subjected 10% SDS-PAGE. Proteins were transferred electrophoretically to Amersham Hybond<sup>TM</sup>-P membranes, blocked with 5% nonfat dry milk in 1xTBS buffer for 1 hour, and reacted with primary antibodies directed against total CREB, P-CREB, and ICER. Bound antibodies were detected using anti-rabbit IgG linked to HRP (1:20.000). Blots were developed with Luminogen TMPS-3 detection reagent A and B and exposed to Kodak BioMax XAR films.

### **Nitrite and nitrate measurements**

Nitrite and nitrate plasma levels were determined using the Nitrate/Nitrite Fluorometric Assay Kit (catalog No. 780051, Cayman Chemical Company) according to the manufacturer's protocol.

## References

- [1] K.D. Dahlquist, N. Salomonis, K. Vranizan, S.C. Lawlor, and B.R. Conklin, GenMAPP, a new tool for viewing and analyzing microarray data on biological pathways. *Nat Genet* 31 (2002) 19-20.
- [2] N. Salomonis, K. Hanspers, A.C. Zambon, K. Vranizan, S.C. Lawlor, K.D. Dahlquist, S.W. Doniger, J. Stuart, B.R. Conklin, and A.R. Pico, GenMAPP 2: new features and resources for pathway analysis. *BMC Bioinformatics* 8 (2007) 217.
- [3] C.A. Molina, N.S. Foulkes, E. Lalli, and P. Sassone-Corsi, Inducibility and negative autoregulation of CREM: an alternative promoter directs the expression of ICER, an early response repressor. *Cell* 75 (1993) 875-86.
- [4] G. Kronke, V.N. Bochkov, J. Huber, F. Gruber, S. Bluml, A. Furnkranz, A. Kadl, B.R. Binder, and N. Leitinger, Oxidized phospholipids induce expression of human heme oxygenase-1 involving activation of cAMP-responsive element-binding protein. *J Biol Chem* 278 (2003) 51006-14.
- [5] M.G. Lee, and P.L. Pedersen, Glucose metabolism in cancer: importance of transcription factor-DNA interactions within a short segment of the proximal region of the type II hexokinase promoter. *J Biol Chem* 278 (2003) 41047-58.
- [6] H. Osawa, R.B. Robey, R.L. Printz, and D.K. Granner, Identification and characterization of basal and cyclic AMP response elements in the promoter of the rat hexokinase II gene. *J Biol Chem* 271 (1996) 17296-303.
- [7] C. Grassl, B. Luckow, D. Schlondorff, and U. Dendorfer, Transcriptional regulation of the interleukin-6 gene in mesangial cells. *J Am Soc Nephrol* 10 (1999) 1466-77.
- [8] A.C. Nagashima, D. Giacomini, C.P. Castro, M.P. Pereda, U. Renner, G.K. Stalla, and E. Arzt, Transcriptional regulation of interleukin-6 in pituitary folliculo-stellate TtT/GF cells. *Mol Cell Endocrinol* 201 (2003) 47-56.
- [9] T. Tokunou, T. Ichiki, K. Takeda, Y. Funakoshi, N. Iino, H. Shimokawa, K. Egashira, and A. Takeshita, Thrombin induces interleukin-6 expression through the cAMP response element in vascular smooth muscle cells. *Arterioscler Thromb Vasc Biol* 21 (2001) 1759-63.
- [10] T. Ohkubo, N. Ohkura, K. Maruyama, K. Sasaki, K. Nagasaki, H. Hanzawa, T. Tsukada, and K. Yamaguchi, Early induction of the orphan nuclear receptor NOR-1 during cell death of the human breast cancer cell line MCF-7. *Mol Cell Endocrinol* 162 (2000) 151-6.
- [11] T. Nomiya, T. Nakamachi, F. Gizard, E.B. Heywood, K.L. Jones, N. Ohkura, R. Kawamori, O.M. Conneely, and D. Bruemmer, The NR4A orphan nuclear receptor NOR1 is induced by platelet-derived growth factor and mediates vascular smooth muscle cell proliferation. *J Biol Chem* 281 (2006) 33467-76.
- [12] B. Middleton, and A. Middleton, Cyclic AMP stimulates the synthesis and function of the low-density lipoprotein receptor in human vascular smooth-muscle cells and fibroblasts. *Biochem J* 282 ( Pt 3) (1992) 853-61.
- [13] W. Zheng, P.B. Brake, K.K. Bhattacharyya, L. Zhang, D. Zhao, and C.R. Jefcoate, Cell selective cAMP induction of rat CYP1B1 in adrenal and testis cells. Identification of a novel cAMP-responsive far upstream enhancer and a second Ah receptor-dependent mechanism. *Arch Biochem Biophys* 416 (2003) 53-67.
- [14] W. Zheng, and C.R. Jefcoate, Steroidogenic factor-1 interacts with cAMP response element-binding protein to mediate cAMP stimulation of CYP1B1 via a far upstream enhancer. *Mol Pharmacol* 67 (2005) 499-512.

- [15] P. Trayhurn, J.S. Duncan, A.M. Wood, and J.H. Beattie, Regulation of metallothionein gene expression and secretion in rat adipocytes differentiated from preadipocytes in primary culture. *Horm Metab Res* 32 (2000) 542-7.
- [16] P. Niforas, M.D. Chu, and P. Bird, A retinoic acid/cAMP-responsive enhancer containing a cAMP responsive element is required for the activation of the mouse thrombomodulin-encoding gene in differentiating F9 cells. *Gene* 176 (1996) 139-47.
- [17] M. Costa, Y. Shen, and R.L. Medcalf, Overexpression of a dominant negative CREB protein in HT-1080 cells selectively disrupts plasminogen activator inhibitor type 2 but not tissue-type plasminogen activator gene expression. *FEBS Lett* 482 (2000) 75-80.
- [18] H.L. Wilson, and W.J. Roesler, CCAAT/enhancer binding proteins: do they possess intrinsic cAMP-inducible activity? *Mol Cell Endocrinol* 188 (2002) 15-20.
- [19] J.W. Zhang, D.J. Klemm, C. Vinson, and M.D. Lane, Role of CREB in transcriptional regulation of CCAAT/enhancer-binding protein beta gene during adipogenesis. *J Biol Chem* 279 (2004) 4471-8.

**Supplemental Table 1:** Microarray results of altered gene expression in rat pulmonary artery smooth muscle cells exposed to GSNO

|                | GSNO | Array 1 | Array 2 | Array 1+2 |
|----------------|------|---------|---------|-----------|
| Up-regulated   | 1h   | 111     | 130     | 65        |
|                | 2h   | 187     | 177     | 101       |
|                | 4h   | 264     | 289     | 138       |
| Down-regulated | 1h   | 63      | 100     | 18        |
|                | 2h   | 98      | 186     | 50        |
|                | 4h   | 290     | 402     | 129       |

DNA microarray techniques measured expression levels of 8,798 Affymetrix gene entries in two independent isolates of RPaSMC that were untreated or exposed to GSNO (100  $\mu\text{mol/L}$ ) for 1, 2, and 4h. The absolute numbers of up-regulated and down-regulated gene entries were filtered by criteria requiring that a gene should have an Affymetrix detection call of *present* after GSNO stimulation in the up-regulated group or before GSNO stimulation in the down-regulated group with at least a two-fold expression change compared to control.



**Supplemental Table 2:** Selected genes known to be activated by cAMP/PKA/CREB

| Gen locus | Name of the gene                                       | mRNA sequence<br>(Rattus norvegicus) | Increase<br>(Fold) | Reference |
|-----------|--------------------------------------------------------|--------------------------------------|--------------------|-----------|
| S66024    | Inducible cAMP early repressor                         | NM_017334.1                          | 140                | [3]       |
| Al179610  | Heme oxygenase 1                                       | NM_012580.2                          | 58                 | [4]       |
| D26393    | Hexokinase-2                                           | NM_012735.1                          | 50                 | [5, 6]    |
| M26744    | Interleukin-6                                          | NM_012589.1                          | 45                 | [7-9]     |
| J05181    | $\gamma$ -glutamylcysteine sythetase<br>(heavy chain)  | NM_012815.2                          | 25                 | [10]      |
|           | $\gamma$ -glutamylcysteine<br>synthetase (light chain) | NM_017305.2                          | 5                  | [10]      |
| GI58853   | Neuron-derived orphan<br>receptor 1                    | NM_017352                            | 20                 | [11]      |
| X13722    | LDL Receptor                                           | NM_175762.2                          | 12                 | [12]      |
| U09540    | CYP1B1 P450                                            | NM_012940.1                          | 10                 | [13, 14]  |
|           | Metallothionein 2A                                     | NM_001137564.1                       | 9                  | [15]      |
| U90121    | Thrombomodulin                                         |                                      | 7                  | [16]      |
| M23697    | Tissue plasminogen<br>activator                        | NM_013151.2                          | 6                  | [17]      |
| S77528    | CCAAT/enhancer binding<br>protein (C/EBP)              | NM_024125.4                          | 5                  | [18, 19]  |

This table shows a selection of genes up-regulated in RPaSMC incubated with GSNO for 4 h, all of which contain CRE promoter sites and are activated by cAMP/PKA/CREB signaling (see References). These observations highlight a link between NO-mediated gene regulation and activation of cAMP/PKA/CREB/CRE signaling in RPaSMC.

## Supplemental Figure Legends

**Supplemental Figure 1.** Scatter plot of genes influenced by GSNO in RPaSMC. Changes of mRNA expression levels of genes in RPaSMC in response to 4 hours incubation with GSNO were determined via Affymetrix microarray. Cells were solubilized, RNA was extracted and mRNA levels analyzed by Affymetrix microarray as described in the method section. The data shows the results of 2 independent experiments. A logarithmic scatter plot of gene expression was generated, upregulated genes are labeled in green, downregulated genes are labeled in blue. In addition to affymetric analysis, the red dots denote those genes whose transcripts were confirmed either via mRNA or immunoblots. The box highlights the gene encoding ICER, which was strongly upregulated by GSNO..

**Supplemental Figure 2.** RNA blot hybridization of RPaSMC exposed to GSNO.

RNA was extracted from untreated RPaSMC and RPaSMC exposed to GSNO for 2h. RNA blot were hybridized with DNA probes specifying heme-oxygenase 1 (HO1), hexokinase 2 (HK2), tissue plasminogen activator (tPA), metallothionein 1 (MT1),  $\gamma$ -glutamylcysteine synthetase heavy (GCS:hc) and light chain (GCS:lc), p21<sup>(Waf1/Cip1)</sup>, soluble guanylate cyclase subunit  $\alpha$ 1 (sGC $\alpha$ 1) and  $\beta$ 1 (sGC $\beta$ 1), endothelin1 (ET1), transforming growth factor- $\beta$ 3 (TGF $\beta$ 3) and angiotensin II receptor (AT2R). Equal loading of RNA on gels was confirmed by staining 28S ribosomal RNA with ethidium bromide. RNA blots shown are representative of at least three different experiments..

**Supplemental Figure 3A-C.** GSNO regulates critical biological pathways. Microarray results for untreated RPaSMCs and RPaSMCs exposed to GSNO for 4h were imported into GenMAPP (<http://www.genmapp.org>) and used to illustrate biological pathways with up- or down-regulated

gene expression. Critical molecular mediators of oxidative stress (A), glutathione metabolism (B), and cellular apoptosis (C) are regulated by GSNO.

**Supplemental Figure 4.** Inhaled nitric oxide (NO) increases pulmonary ICER protein levels in vivo. **A.** Immunoblots of ICER protein levels from lungs of WT mice breathing air supplemented with or without NO gas (80 ppm) for 2h are shown. **B:** Analysis of the immunoblots shown in A:  $n=5$  mice in each group; mean $\pm$ SD; \* $p<0.05$  lungs of WT mice breathing inhaled NO vs without breathing NO.

**Supplemental Figure 5.** Plasma nitrite and nitrate levels are similar in WT and sGC $\alpha 1^{-/-}$  mice breathing NO. WT mice and mice deficient for the soluble guanylate cyclase  $\alpha 1$  subunit (sGC $\alpha 1^{-/-}$ ) breathed air supplemented without or with nitric oxide (iNO, 80 ppm) for 2h, and plasma nitrite and nitrate levels were measured. Breathing NO increased plasma nitrite and nitrate levels in WT and sGC $\alpha 1^{-/-}$  mice.  $n=5$  mice in each group, mean $\pm$ SD; \* $p<0.05$  air supplemented with NO vs without NO.

**Supplemental Figure 6.** The PKA inhibitor H89 inhibits the ability of GSNO to induce ICER gene expression. RPaSMC were preincubated with H89 (10  $\mu$ mol/L) for 30 min and then stimulated with and without 100  $\mu$ mol/L GSNO for 2h. RNA was extracted, and relative ICER mRNA levels were quantitated using qRT-PCR.  $n=3$  per experimental group; mean $\pm$ SD; \* $p<0.05$  GSNO vs untreated RPaSMC, # $p<0.05$  H89 with GSNO vs GSNO alone.

**Supplemental Figure 7.** PKG activators do not induce CRE-dependent gene transcription in RPaSMC. RPaSMC were transfected with CRE-luciferase reporter plasmid. Luciferase activities were measured in RPaSMC stimulated with cGMP analogues, Sp-8-pCPT-cGMP (100

$\mu\text{mol/L}$ ) or Sp-8-Br-cGMP (100  $\mu\text{mol/L}$ ), or the cAMP analogue, 8-Br-cAMP (1  $\text{mmol/L}$ ), for 4 h (\* $p=0.001$  8-Br-cAMP vs control).

**Supplemental Figure 8. A:** Forskolin-mediated ICER induction is  $\text{Ca}^{2+}$ -dependent. RPaSMC were pretreated with the intracellular  $\text{Ca}^{2+}$  chelator, BAPTA-AM (50  $\mu\text{mol/L}$ ), for 30 minutes and stimulated with the forskolin (FK). Intracellular  $\text{Ca}^{2+}$  chelation abrogated forskolin-mediated induction of ICER gene expression. \* $p=0.0053$  FK vs control, † $p=0.0055$  FK with BAPTA-AM vs FK only. **B:** RPaSMC were pretreated with the SOCC inhibitor, SKF-96365 (50  $\mu\text{mol/L}$ ), for 30 minutes and stimulated with the adenylate-cyclase activator, forskolin. SOCC inhibition abrogated forskolin-mediated induction of ICER gene expression. \* $p=0.0003$  FK vs control, # $p=0.0002$  SKF-96365 with FK vs FK alone.
