# Supplementary material
Source: PubMed Central journal article supplement (PMC3466086)

# Supplemental Figure 1

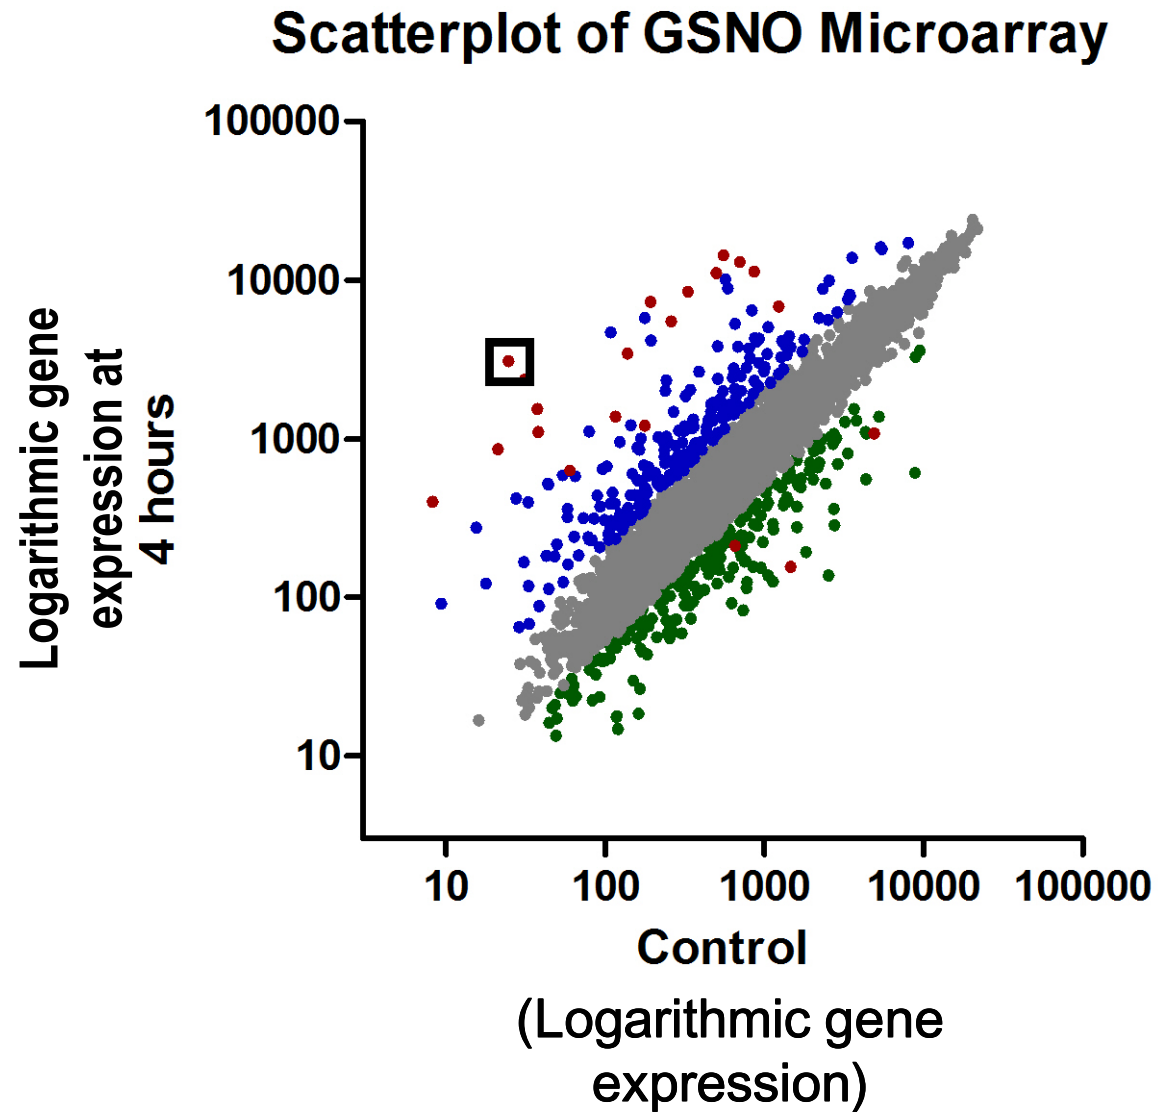

## Supplemental Figure 2

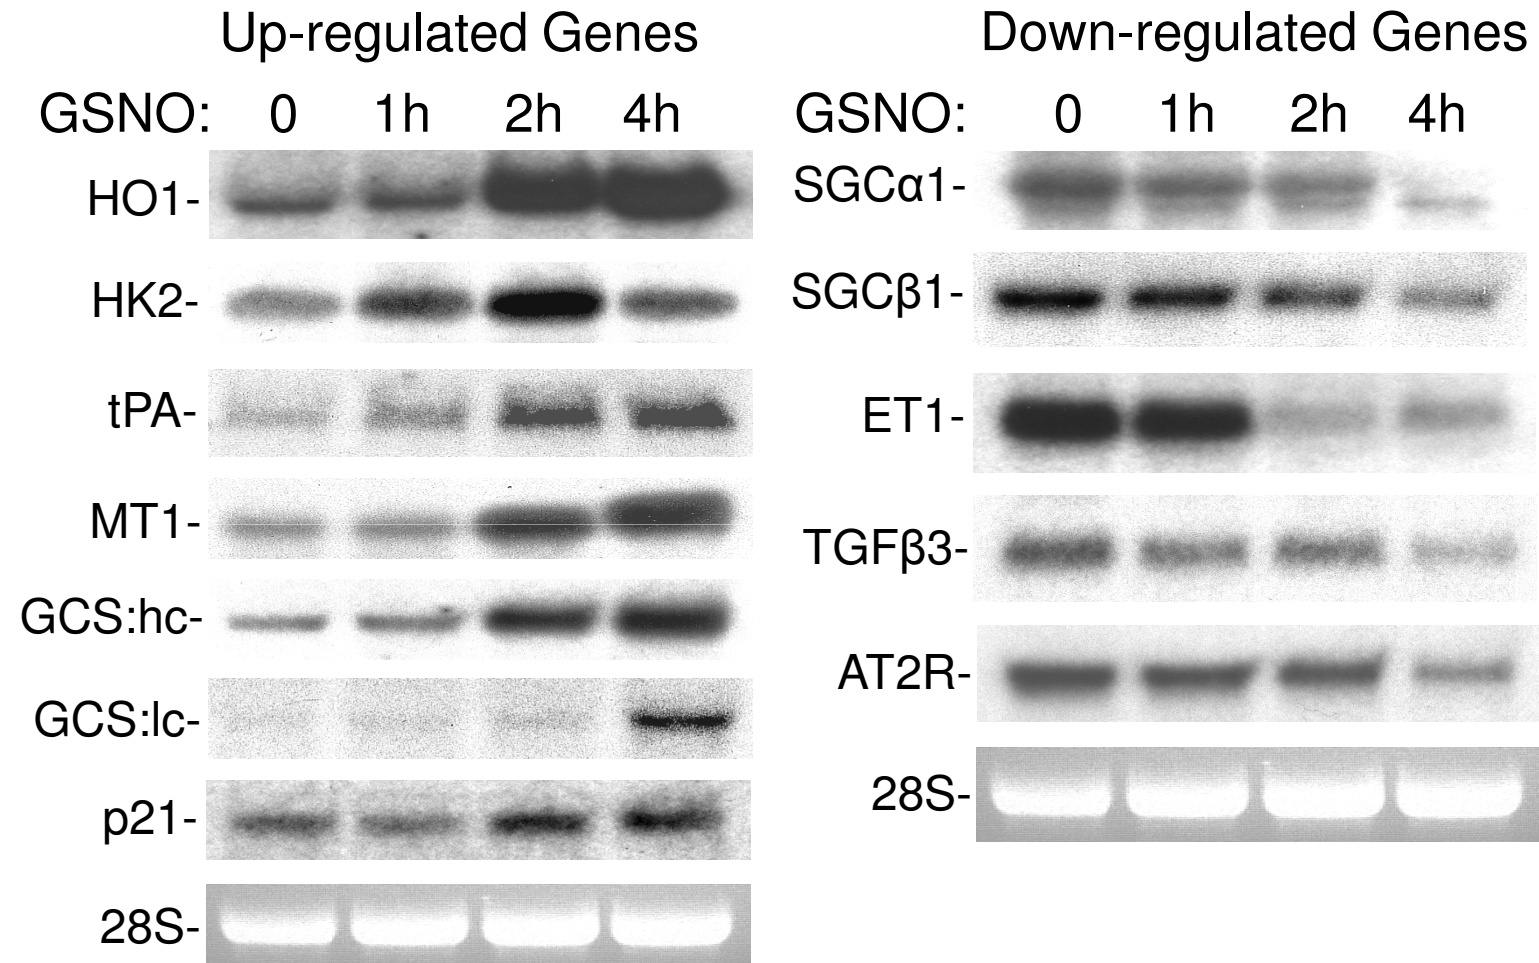

# Supplemental Figure 3A

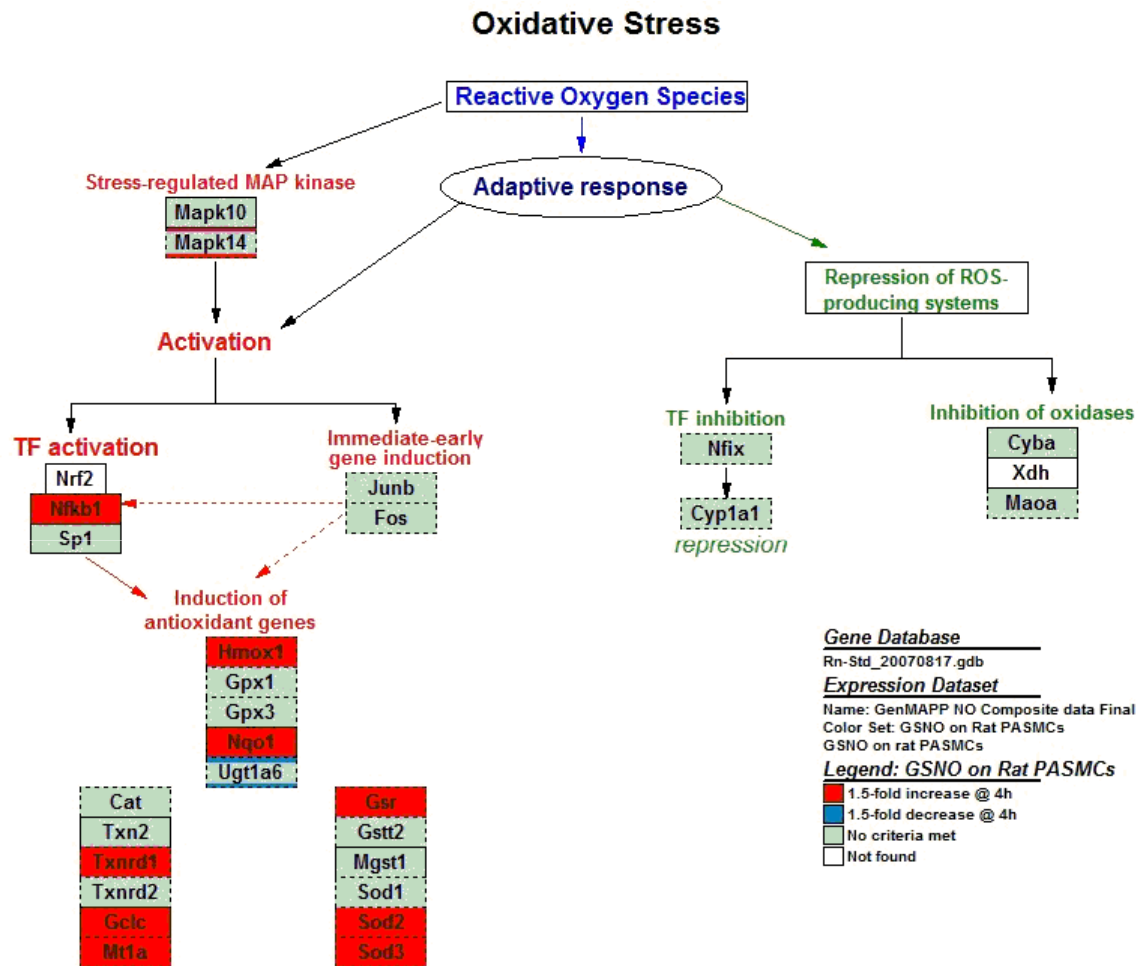

**Author:** Niradiz Reyes and Ismael Reyes

**E-mail:** Niradiz\_Reyes@nymc.edu

**Last modified:** 02/04/04

Adapted from Biochem J 1999 Sep 15;342 Pt 3:481-96

**License:** [Creative Commons Attribution 3.0 Unported License](https://creativecommons.org/licenses/by/3.0/)

# Supplemental Figure 3B

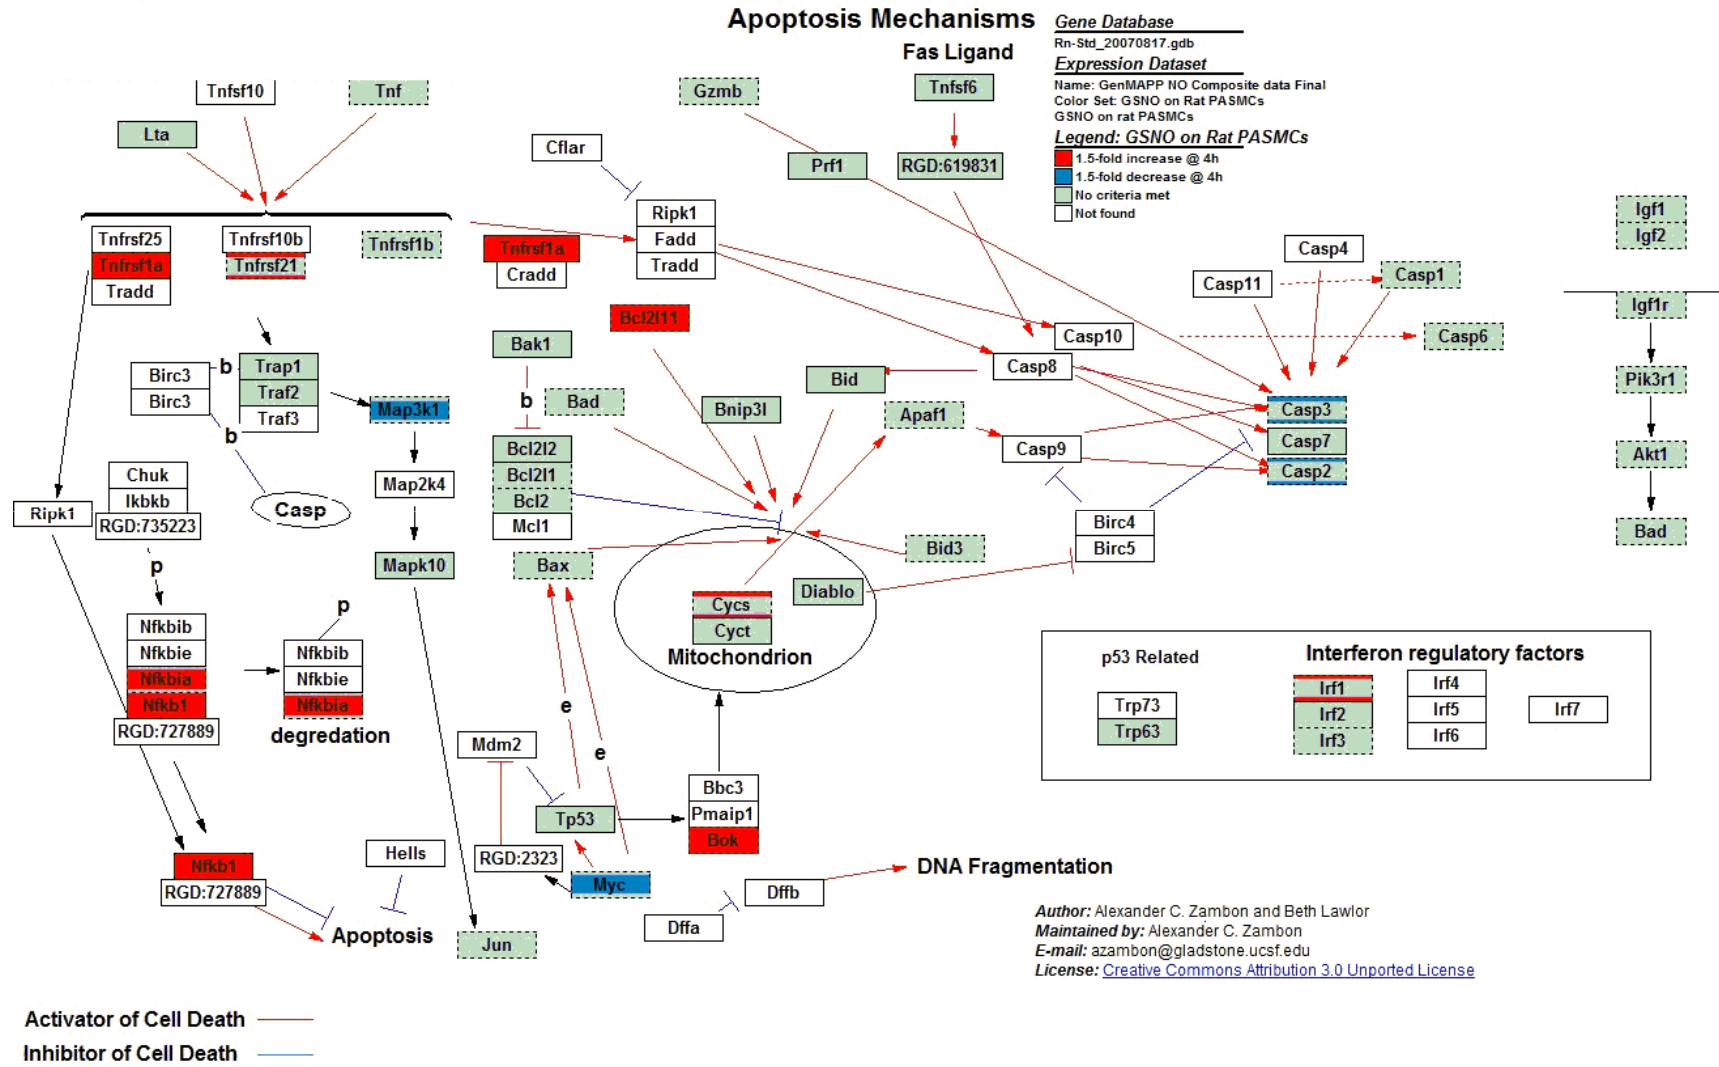

# Supplemental Figure 3C

## Glutathione metabolism

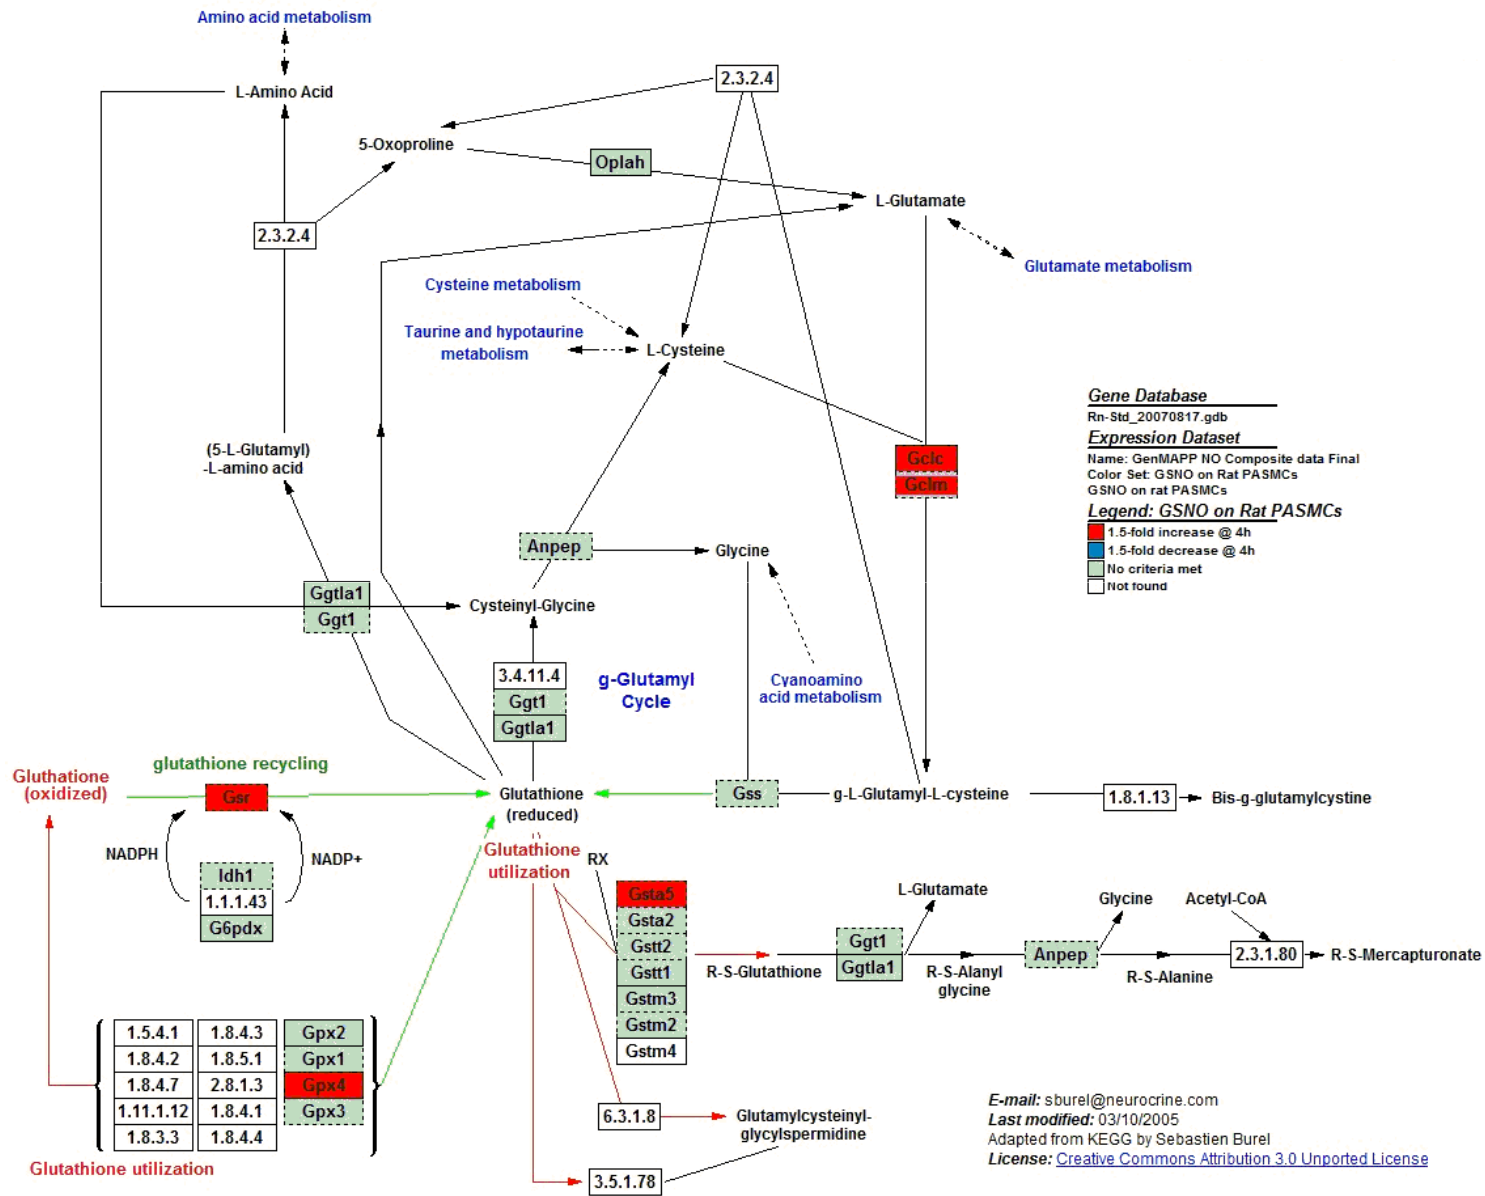

# Supplemental Figure 4

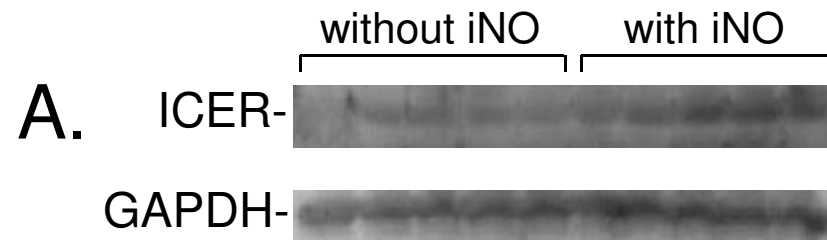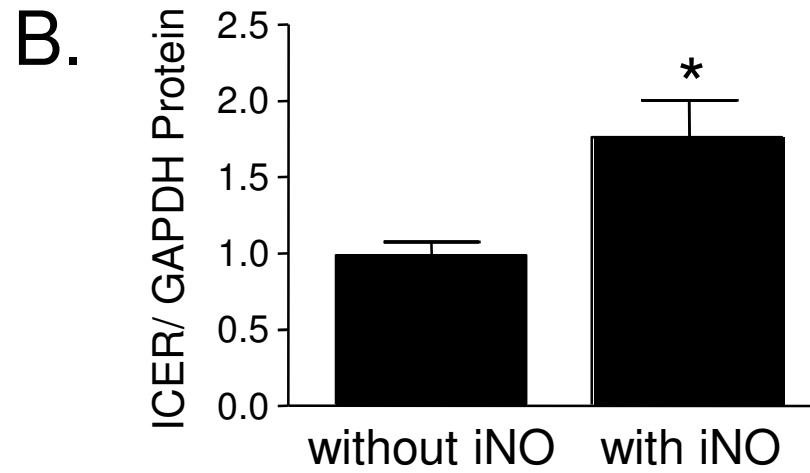

# Supplemental Figure 5

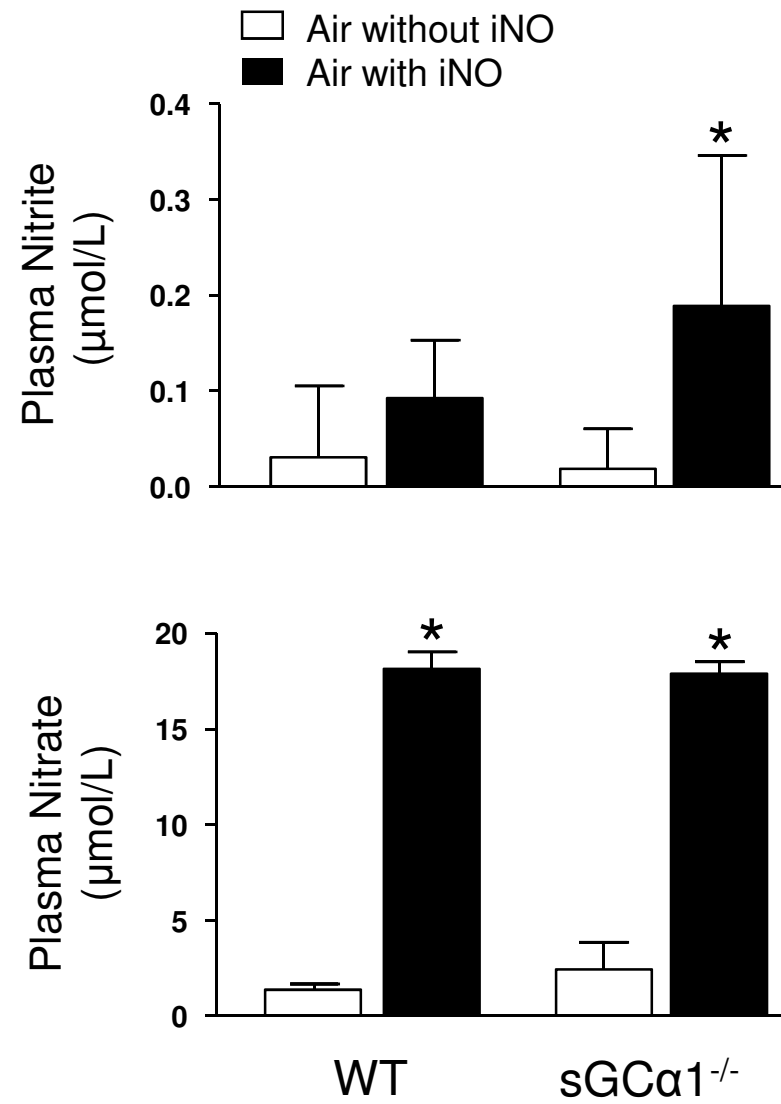

# Supplemental Figure 6

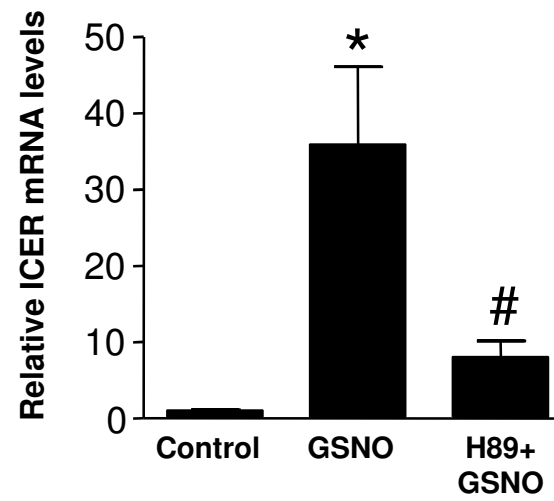



# Supplemental Figure 7

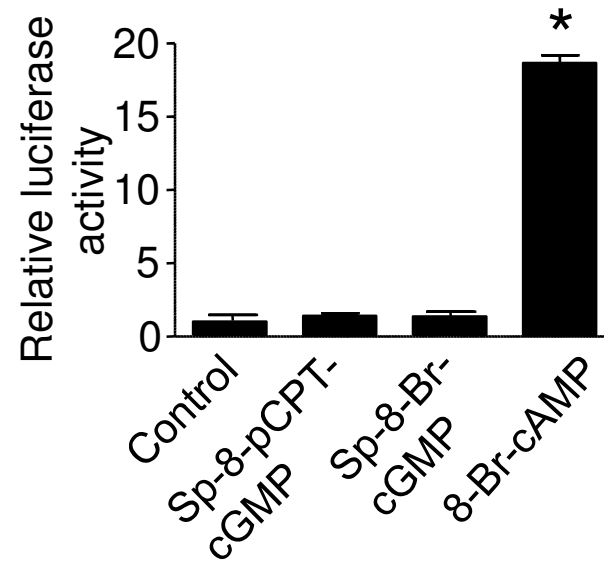

# Supplemental Figure 8

**A**

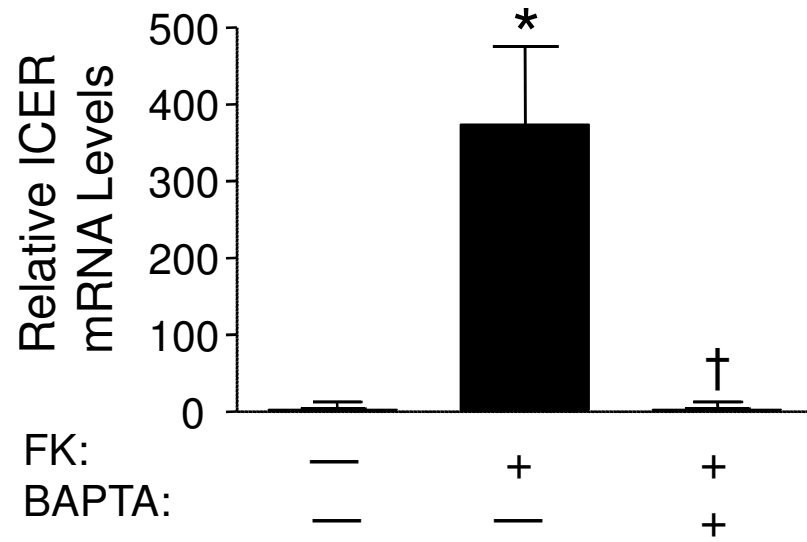

**B**

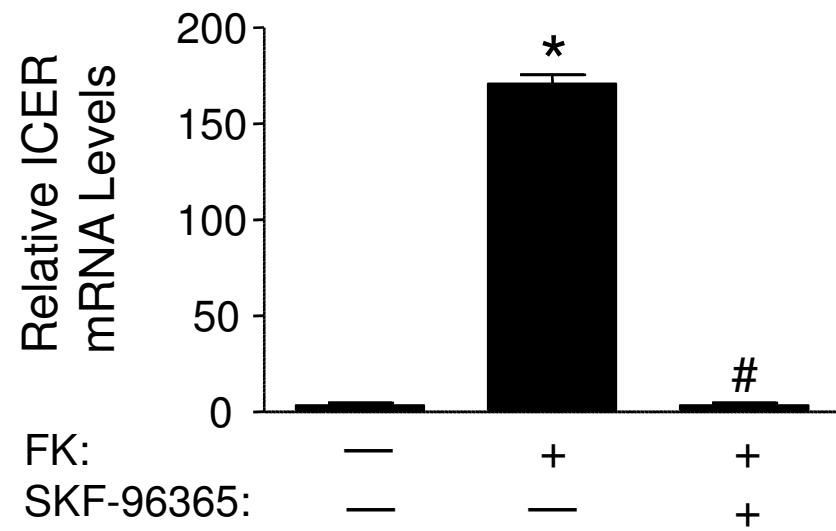

Supplement: NIHMS300356-supplement-02.pdf [file NIHMS300356-supplement-02.pdf]
